# Supplementary material for: Phosphorus–nitrogen compounds. Part 36. Syntheses, Langmuir–Blodgett thin films and biological activities of spiro-bino-spiro trimeric phosphazenes
Source: Royal Society of Chemistry journal article supplement (doi:10.1039/c6nj02052f), 2016-01-01
Supplement: c6nj02052f1.pdf [file c6nj02052f1.pdf]

## Supplementary Info

### Phosphorus-Nitrogen Compounds. Part 36. Syntheses, Langmuir-Blodgett Thin Films and Biological Activities of Spiro-Bino-Spiro Trimeric Phosphazenes

Nuran Asmafiliz <sup>a,\*</sup>, Zeynel Kılıç<sup>a,\*</sup>, Mehmet Civan<sup>b</sup>, Orhan Avcı<sup>c</sup>, L. Yasemin Gönder (nee Koç)<sup>d</sup>,

Leyla Açıkc, Betül Aydın<sup>c</sup>, Mustafa Türk<sup>d</sup> and Tuncer Hökelek<sup>b</sup>

<sup>a</sup>Department of Chemistry, Ankara University, 06100 Ankara, Turkey,

<sup>b</sup>Department of Physics, Hacettepe University, 06800 Ankara, Turkey,

<sup>c</sup>Department of Biology, Gazi University, 06500 Ankara, Turkey,

<sup>d</sup>The Turkish Sugar Authority, 06510 Çankaya-Ankara, Turkey,

<sup>e</sup>Department of Bioengineering, Kırıkkale University, 71450 Yahşihan-Kırıkkale, Turkey

#### Contents:

#### Figure Captions

- **Fig. S1.** The conformations of (a) the phosphazene ring and (b) the five-membered spiro-ring. (c) The packing diagram of **5**.
- **Fig. S2.** The conformations of (a) the phosphazene ring and (b) the five-membered spiro-ring. (c) The packing diagram of **6**.
- **Fig. S3.** The conformations of (a) the phosphazene ring and (b) the six-membered spiro-ring. (c) The packing diagram of **12**.
- **Fig. S4.** The shapes of the phosphazene rings in **5**, **6** and **12** with torsion angles (deg).

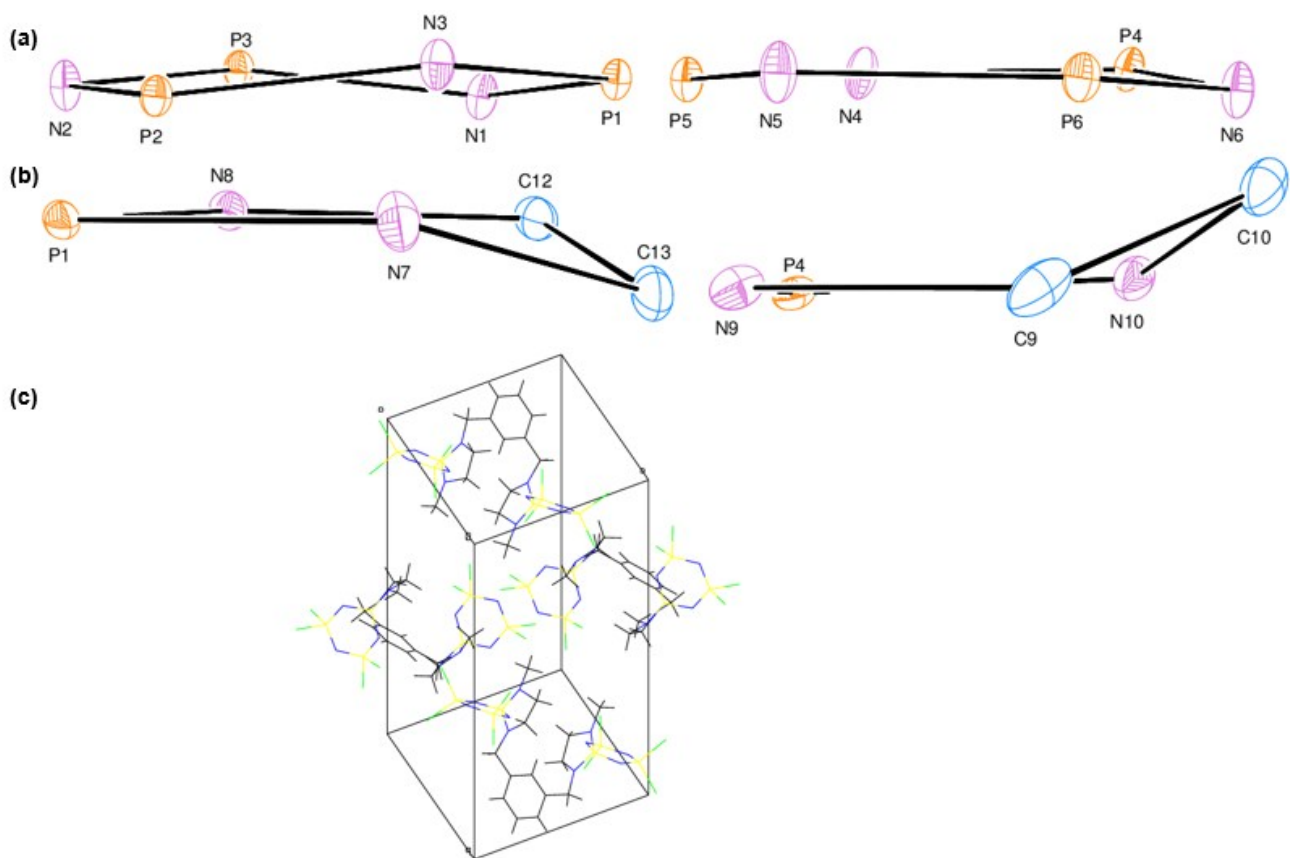

**Fig. S1.** The conformations of (a) the phosphazene ring and (b) the five-membered spiro-ring. (c) The packing diagram of **5**.

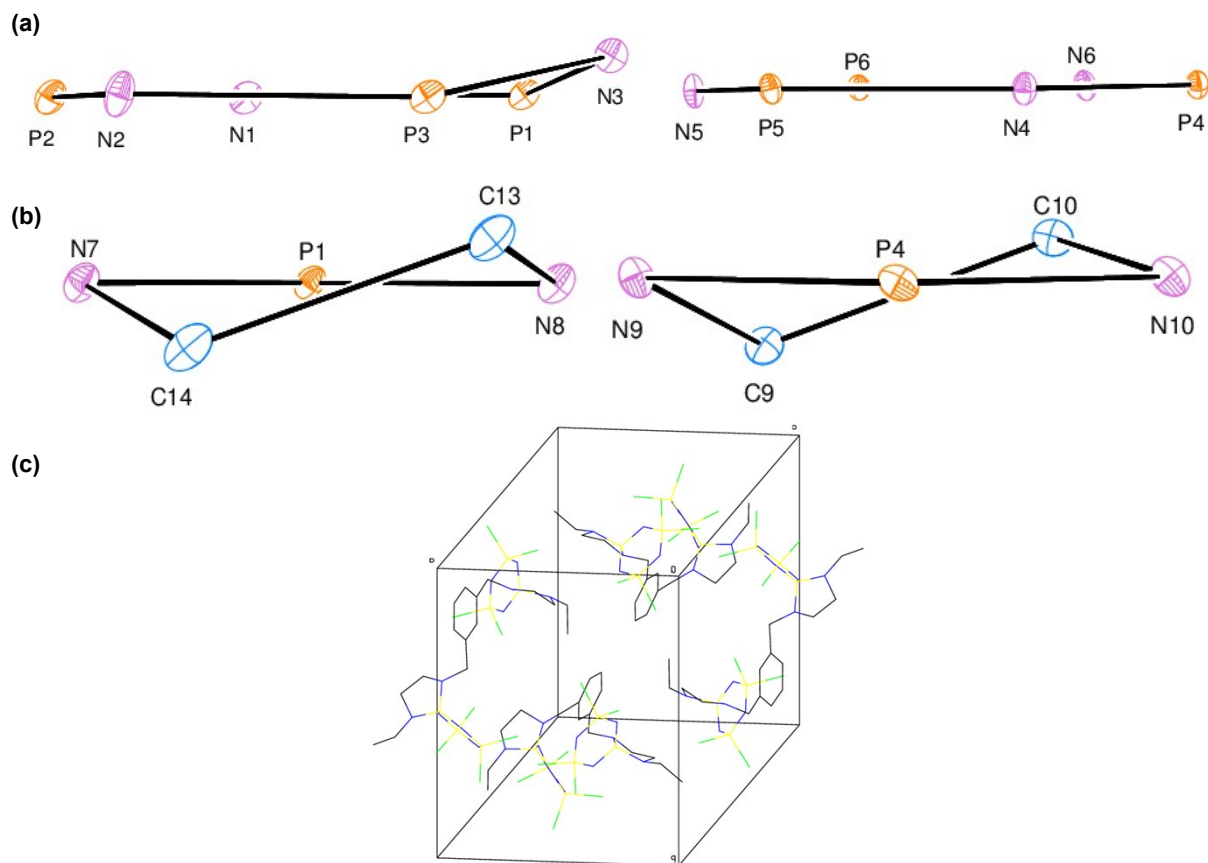

**Fig. S2.** The conformations of (a) the phosphazene ring and (b) the five-membered spiro-ring. (c) The packing diagram of **6**.

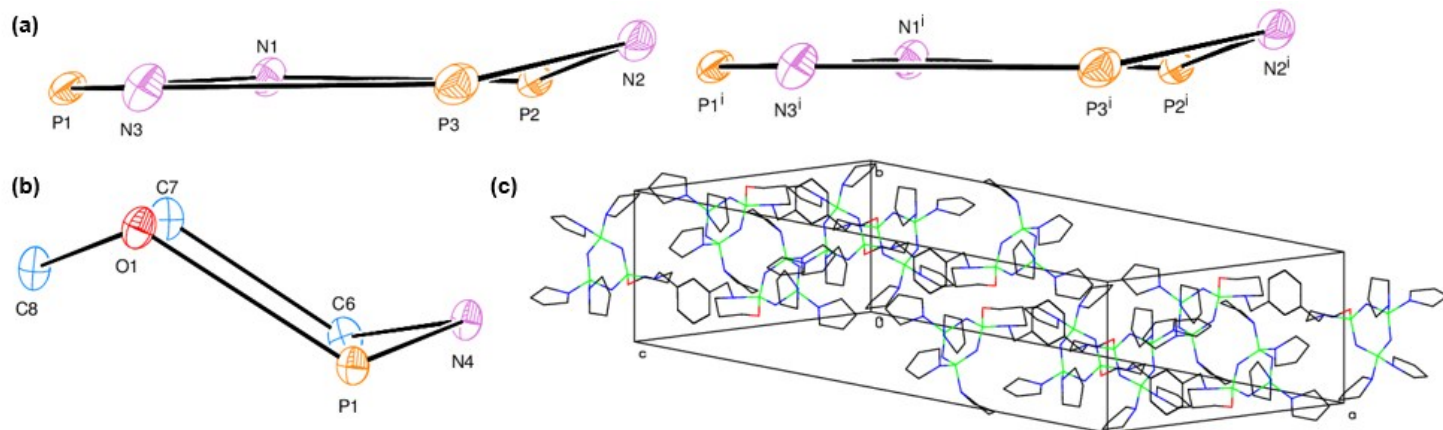

**Fig. S3.** The conformations of (a) the phosphazene ring and (b) the six-membered spiro-ring. (c) The packing diagram of **12**.

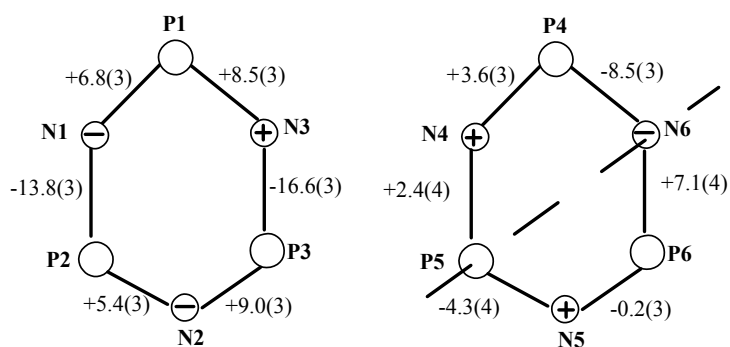

**compound 5**

The P1/N1/P2/N2/P3/N3 phosphazene ring does not have a pseudo mirror plane, but the P4/N4/P5/N5/P6/N6 ring seems to have a pseudo mirror plane.

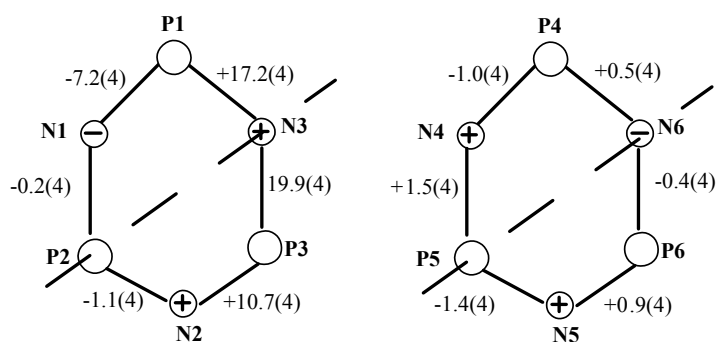

**compound 6**

The P1/N1/P2/N2/P3/N3 phosphazene ring does not have a pseudo mirror plane, but the P4/N4/P5/N5/P6/N6 ring seems to have a pseudo mirror plane.

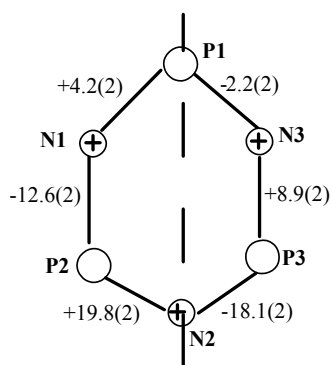

**compound 12**

The P1/N1/P2/N2/P3/N3 phosphazene ring has a pseudo mirror plane.

**Fig. S4.** The shapes of the phosphazene rings in **5**, **6** and **12** with torsion angles (deg).
